# Supplementary material for: Energy, Nutrient and Food Intakes of Male Shift Workers Vary According to the Schedule Type but Not the Number of Nights Worked
Source: Nutrients. 2020 Mar 27;12(4):919. doi: 10.3390/nu12040919 (PMC7230522; doi:10.3390/nu12040919)
Supplement: Supplementary file 1 [file nutrients-12-00919-s001.pdf]

Supplementary Material

# Energy, Nutrient and Food Intakes of Male Shift Workers Vary According to the Schedule Type but Not the Number of Nights Worked

Sophie Bucher Della Torre <sup>1,\*</sup>, Pascal Wild <sup>2,3</sup>, Victor Dorribo <sup>2</sup>, Brigitta Danuser <sup>2,†</sup> and Francesca Amati <sup>4,†</sup>

**Table S1.** Proportion (%) of energy intake for each 8-hour period during different schedule types.

|         | Day | Evening | Half Night | Split night | Night | Recovery | Off |
|---------|-----|---------|------------|-------------|-------|----------|-----|
| 5am–1pm | 48  | 34      | 33         | 37          | 33    | 29       | 36  |
| 1pm–9pm | 44  | 52      | 43         | 26          | 53    | 53       | 56  |
| 9pm–5am | 8   | 13      | 24         | 37          | 14    | 18       | 8   |
